# Supplementary material for: Native-like SARS-CoV-2 spike glycoprotein expressed by ChAdOx1 nCoV-19/AZD1222 vaccine
Source: PubMed Central journal article supplement (PMC7836103; doi:10.1101/2021.01.15.426463), 2021-01-19
Supplement: media-1.pdf [file media-1.pdf]

Supplementary Information for:

Native-like SARS-CoV-2 spike glycoprotein expressed by ChAdOx1  
nCoV-19/AZD1222 vaccine

Yasunori Watanabe<sup>1,2\*</sup>, Luiza Mendonça<sup>3\*</sup>, Elizabeth R. Allen<sup>4\*</sup>, Andrew Howe<sup>5</sup>,  
Mercede Lee<sup>4</sup>, Joel D. Allen<sup>1</sup>, Himanshi Chawla<sup>1</sup>, David Pulido<sup>4</sup>, Francesca  
Donnellan<sup>4</sup>, Hannah Davies<sup>4</sup>, Marta Ulaszewska<sup>4</sup>, Sandra Belij-Rammerstorfer<sup>4,6</sup>,  
Susan Morris<sup>4</sup>, Anna-Sophia Krebs<sup>3</sup>, Wanwisa Dejnirattisai<sup>7</sup>, Juthathip  
Mongkolsapaya<sup>7,9,10</sup>, Piyada Supasa<sup>7</sup>, Gavin R. Screaton<sup>7,8</sup>, Catherine M. Green<sup>7</sup>,  
Teresa Lambe<sup>4,6,#</sup>, Peijun Zhang<sup>3,5,#</sup>, Sarah C. Gilbert<sup>4,6,#</sup>, Max Crispin<sup>1,#</sup>

<sup>1</sup>School of Biological Sciences, University of Southampton, Southampton, SO17 1BJ, UK

<sup>2</sup>Oxford Glycobiology Institute, Department of Biochemistry, University of Oxford, South  
Parks Road, Oxford, OX1 3QU, UK

<sup>3</sup>Division of Structural Biology, University of Oxford, Wellcome Centre for Human Genetics,  
Oxford, OX3 7BN, UK

<sup>4</sup>The Jenner Institute, Nuffield Department of Medicine, University of Oxford, Oxford, UK

<sup>5</sup>Electron Bio-imaging Centre, Diamond Light Source, Harwell Science and Innovation  
Campus, Didcot, OX11 0DE, UK

<sup>6</sup>NIHR Oxford Biomedical Research Centre, Oxford, UK

<sup>7</sup>The Wellcome Centre for Human Genetics, University of Oxford, Roosevelt Drive, Oxford  
OX3 7BN, UK

<sup>8</sup>Division of Medical Sciences, John Radcliffe Hospital, University of Oxford, Oxford, UK

<sup>9</sup>Dengue Hemorrhagic Fever Research Unit, Office for Research and Development, Faculty of Medicine, Siriraj Hospital, Mahidol University, Bangkok, Thailand

<sup>10</sup>Chinese Academy of Medical Science(CAMS) Oxford Institute (COI), University of Oxford, Oxford, U.K.

#Corresponding authors. Email: [max.crispin@soton.ac.uk](mailto:max.crispin@soton.ac.uk) (M.C.), [peijun@strubi.ox.ac.uk](mailto:peijun@strubi.ox.ac.uk) (P.Z), [sarah.gilbert@ndm.ox.ac.uk](mailto:sarah.gilbert@ndm.ox.ac.uk) (S.C.G.), [teresa.lambe@ndm.ox.ac.uk](mailto:teresa.lambe@ndm.ox.ac.uk) (T.L.)

\*These authors contributed equally to this work

This document includes:

Supplementary Figures 1-4

Supplementary Table 1

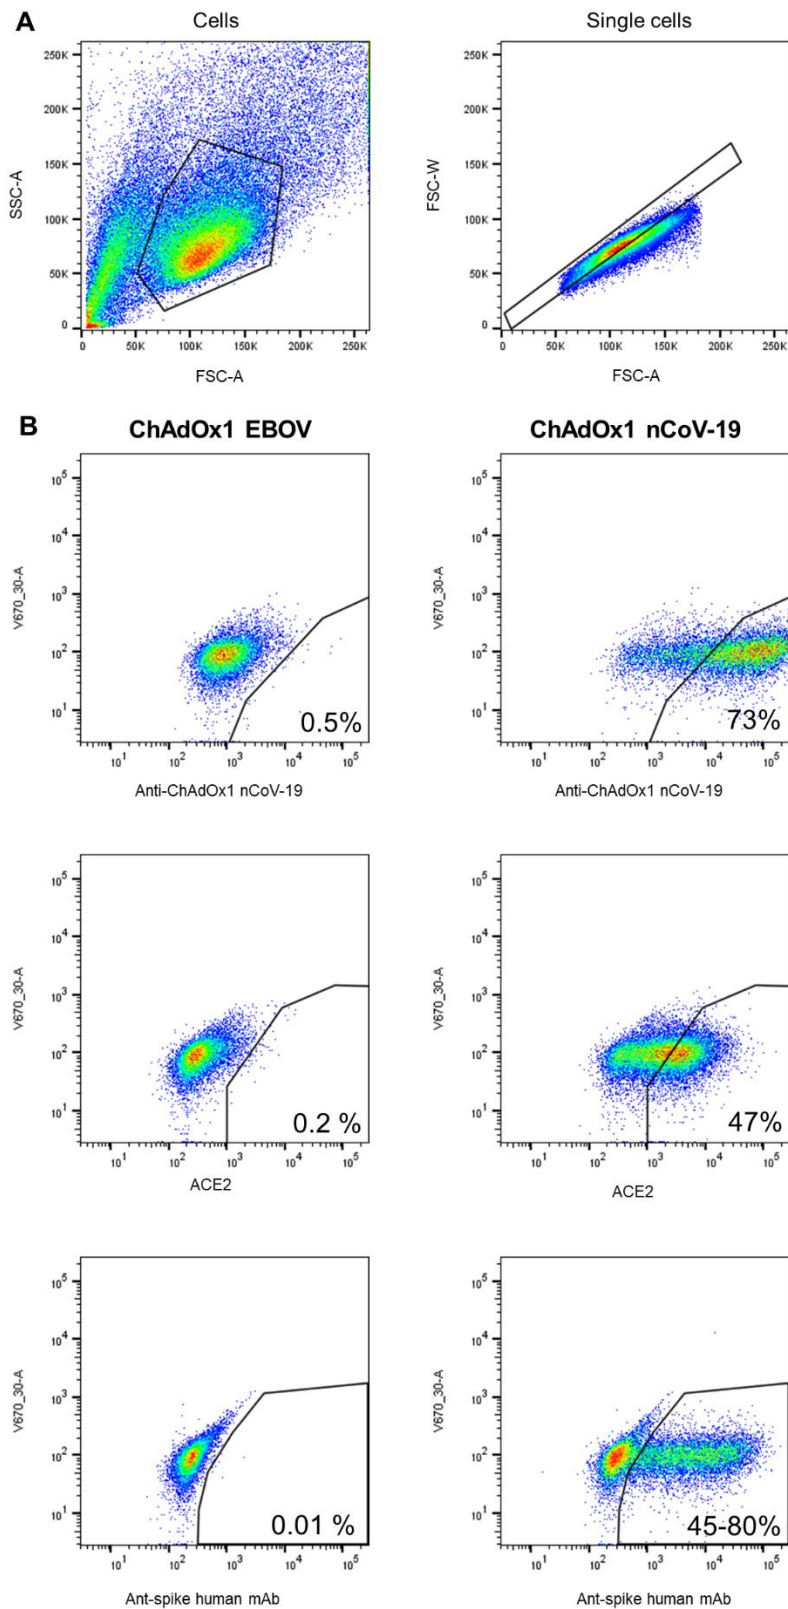

### Supplementary Figure 1. Gating strategy for vaccine expression FACS

(A) Single cells were isolated for further analysis. (B) Percentages of positive cells were determined using the gating strategy determined in uninfected cells and displayed for ChAdOx1- EBOV (left panels) and ChAdOx1-nCoV19 (right panels) infected cells, with percentage of positive cells indicated in gate. Representative data is shown, for human mAbs data for mAb 71 is shown.

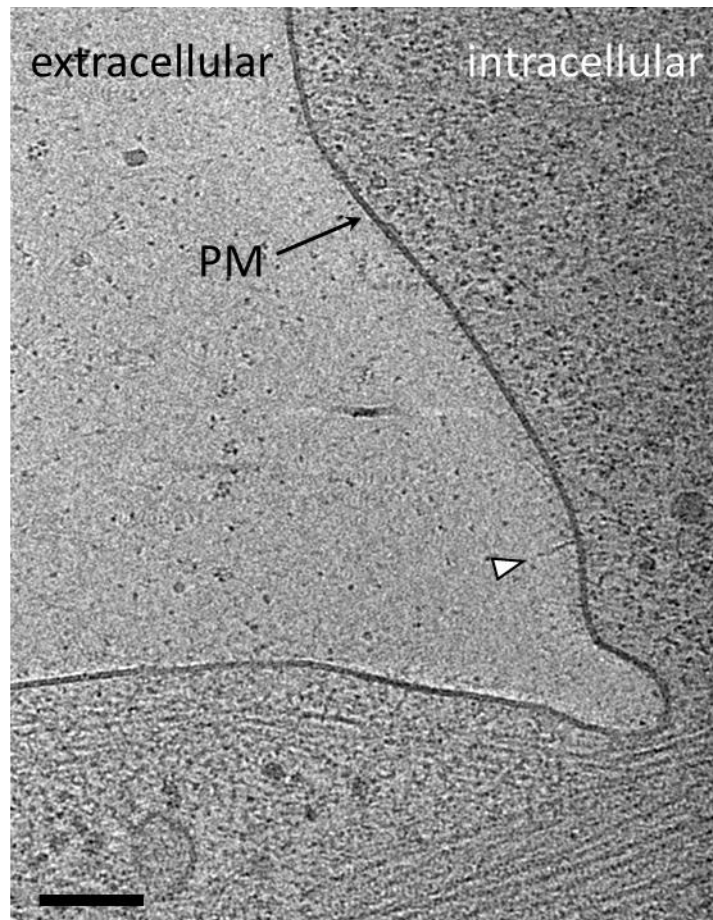

**Supplementary Figure 2. Non-transduced cells lack prefusion-like surface receptors.** Tomographic slice of U2OS control cell surface. PM – Plasma membrane. Slice is 2.13 Å thick. White arrowhead point to a thin and elongated surface receptor. Scale bar is 100 nm.

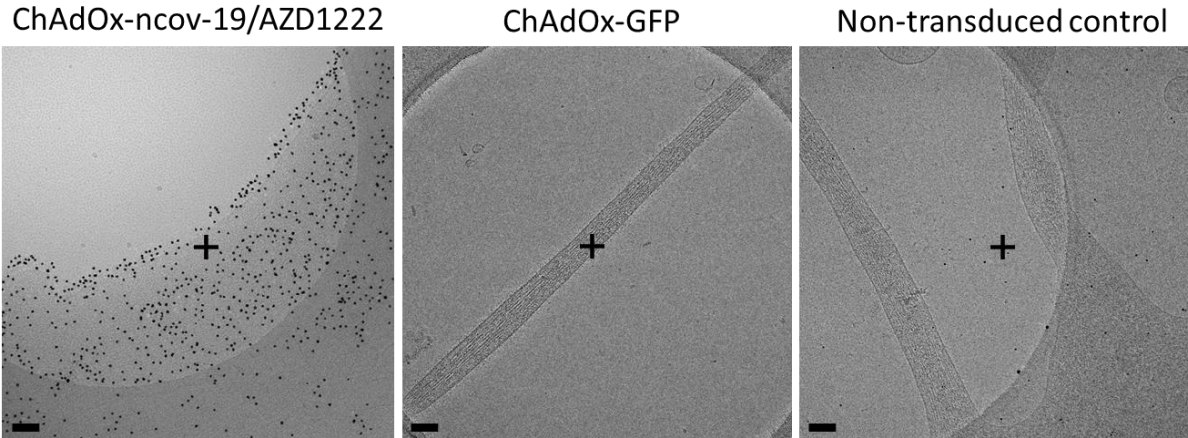

**Supplementary Figure 3. Cryoimmunolabelling of ChAdOx-nCoV-19/AZD1222 derived spike.** Cryo-EM image of U2OS cells transduced with ChAdOx-nCoV-19/AZD1222, ChAdOx-GFP and non-transduced controls. Cells were incubated with ChAdOx-nCoV-19/AZD1222 vaccinated mice sera and labelled with anti-mouse Fab conjugated with 10nm Au beads prior to plunge freezing. Scale bar is 100 nm.

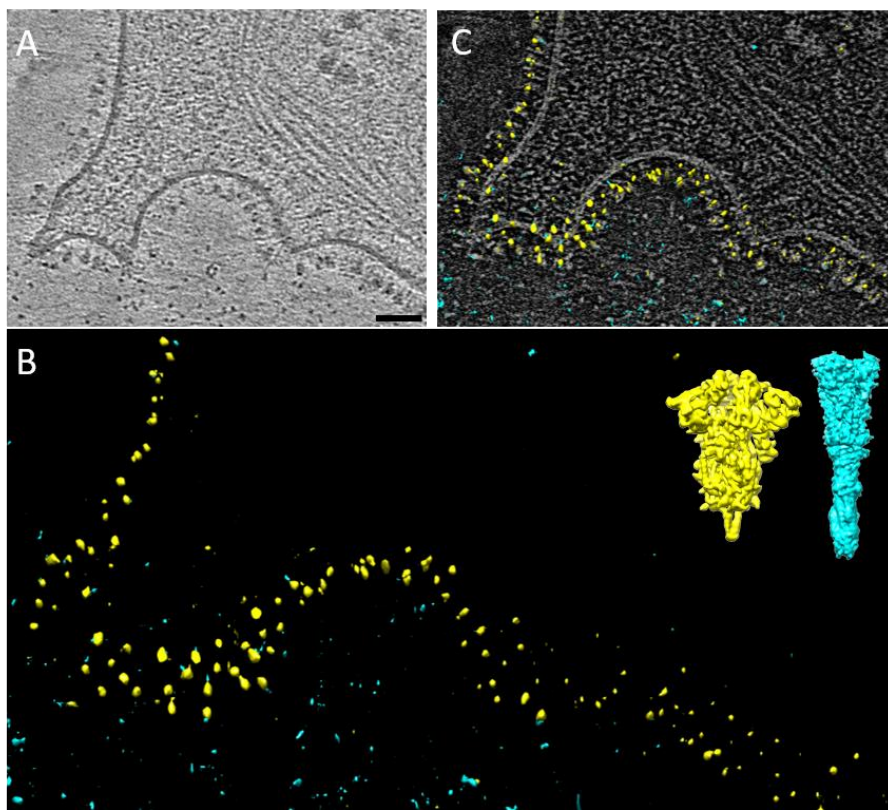

**Supplementary Figure 4. Template searching for pre- and post-fusion spike proteins.** (A) Tomographic slice of a ChAdOx nCoV-19 infected U2OS cell. (B) Results of template matching by cross-correlation of tomographic volume with either a pre-fusion spike reference (EMD-21452, yellow) or a post-fusion spike reference (EMD-7040, cyan). The resulting cross-correlation maps are projected through 18.5 nm thick volume. Inset, the pre- (yellow) and post-fusion (cyan) spike references. (C) The template matching results shown in (B) overlaid with a 1.6 nm thick tomographic slice in (A). Scale bar is 50 nm.

**Supplementary Table 1. Glycoform abundances observed across S0 and S1/S2 SARS-CoV-2 spike protein derived from ChAdOx1 nCoV-19.**

**Cleaved**

|                | N17  | N61 | N74  | N122 | N149 | N165 | N234 | N282 | N331 | N343 | N603 | N616 | N657 | N709 | N717 | N801 | N1074 | N1098 | N1134 | N1156 | N1173 | N1194 | Total |
|----------------|------|-----|------|------|------|------|------|------|------|------|------|------|------|------|------|------|-------|-------|-------|-------|-------|-------|-------|
| Mannose/Hybrid | 0%   | 81% | 0%   | 60%  | n/a  | 0%   | 94%  | 18%  | 11%  | 74%  | 0%   | 100% | 100% | 100% | 100% | 82%  | 100%  | 25%   | n/a   | n/a   | n/a   | n/a   | 56%   |
| Complex        | 0%   | 19% | 100% | 40%  | n/a  | 100% | 6%   | 82%  | 89%  | 26%  | 100% | 0%   | 0%   | 0%   | 0%   | 18%  | 0%    | 75%   | n/a   | n/a   | n/a   | n/a   | 38%   |
| Unoccupied     | 100% | 0%  | 0%   | 0%   | n/a  | 0%   | 0%   | 0%   | 0%   | 0%   | 0%   | 0%   | 0%   | 0%   | 0%   | 0%   | 0%    | 0%    | n/a   | n/a   | n/a   | n/a   | 6%    |

**Uncleaved**

|                | N17 | N61  | N74  | N122 | N149 | N165 | N234 | N282 | N331 | N343 | N603 | N616 | N657 | N709 | N717 | N801 | N1074 | N1098 | N1134 | N1156 | N1173 | N1194 | Total |
|----------------|-----|------|------|------|------|------|------|------|------|------|------|------|------|------|------|------|-------|-------|-------|-------|-------|-------|-------|
| Mannose/Hybrid | n/a | 100% | 100% | 81%  | n/a  | 72%  | 98%  | 74%  | 78%  | 69%  | 69%  | 100% | 100% | 100% | 100% | 66%  | 86%   | 69%   | 100%  | n/a   | n/a   | n/a   | 85%   |
| Complex        | n/a | 0%   | 0%   | 19%  | n/a  | 28%  | 2%   | 26%  | 22%  | 31%  | 31%  | 0%   | 0%   | 0%   | 0%   | 34%  | 14%   | 31%   | 0%    | n/a   | n/a   | n/a   | 15%   |
| Unoccupied     | n/a | 0%   | 0%   | 0%   | n/a  | 0%   | 0%   | 0%   | 0%   | 0%   | 0%   | 0%   | 0%   | 0%   | 0%   | 0%   | 0%    | 0%    | 0%    | n/a   | n/a   | 0%    | 0%    |
